# Supplementary material for: Consolidative Hematopoietic Stem Cell Transplantation After CD19 CAR-T Cell Therapy for Acute Lymphoblastic Leukemia: A Systematic Review and Meta-analysis
Source: PubMed Central journal article supplement (PMC8139250; doi:10.3389/fonc.2021.651944), 2021-04-28
Supplement: Table_1.pdf [file Table_1.pdf]

| Author and Year  | Selection | Comparability | Outcome | Total (maximum score 9*) |
|------------------|-----------|---------------|---------|--------------------------|
| Park 2018 [11]   | ****      | *             | ***     | ***** (8)                |
| Lee 2016 [19]    | ****      |               | ***     | ***** (7)                |
| Jacoby 2018 [7]  | ****      |               | *       | ***** (5)                |
| Turtle 2016 [9]  | ****      | *             | *       | ***** (6)                |
| Gardner 2017 [5] | ****      |               | *       | ***** (5)                |
| Cao 2018 [16]    | ****      |               | *       | ***** (5)                |
| Jiang 2019 [8]   | ****      | *             | *       | ***** (6)                |
| Gu 2020 [6]      | ****      | *             | ***     | ***** (8)                |
| Zhao 2020 [1]    | ****      | *             | ***     | ***** (8)                |
| Zhang 2020 [24]  | ****      | *             | *       | ***** (6)                |
| Wang 2020 [10]   | ****      |               | *       | ***** (5)                |
